# Supplementary material for: Geometric regulation of histone state directs melanoma reprogramming
Source: PubMed Central journal article supplement (PMC7334222; doi:10.1038/s42003-020-1067-1), 2020-07-03
Supplement: 42003_2020_1067_MOESM4_ESM.pdf [file 42003_2020_1067_MOESM4_ESM.pdf]

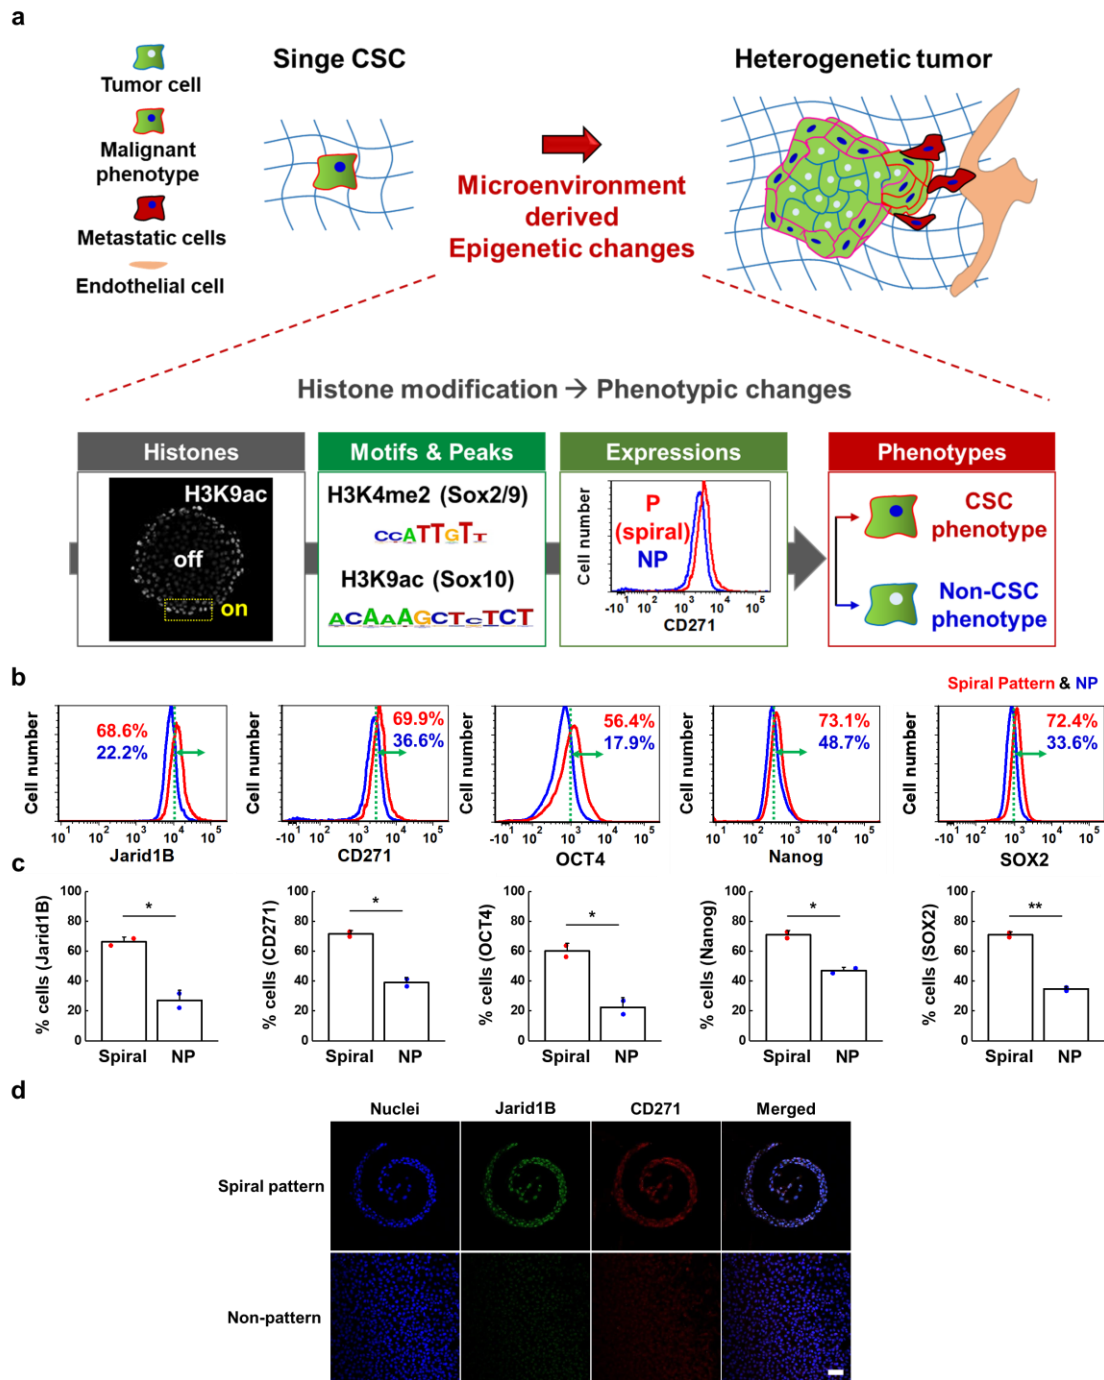

**Supplementary Fig. 1. a** Scheme of phenotypic alterations caused by histone modifications in response to microenvironment derived epigenetic changes. **b** Flow cytometry characterization of MIC (Jarid1B and CD271) and stemness (Oct4, Nanog, and Sox2) markers in B16F0 cells cultured on spiral patterned or non-patterned substrates. **c** Quantification of cell ration above the thresholds ( $n = 2$ , biological replicates). **d** Representative confocal images of Jarid1B and CD271 for B16F0 cells cultured on spiral patterned or non-patterned substrates. Scale bars, 50  $\mu\text{m}$ . \* $P < 0.05$ , \*\* $P < 0.005$ , ANOVA. Error bars represent s.d.

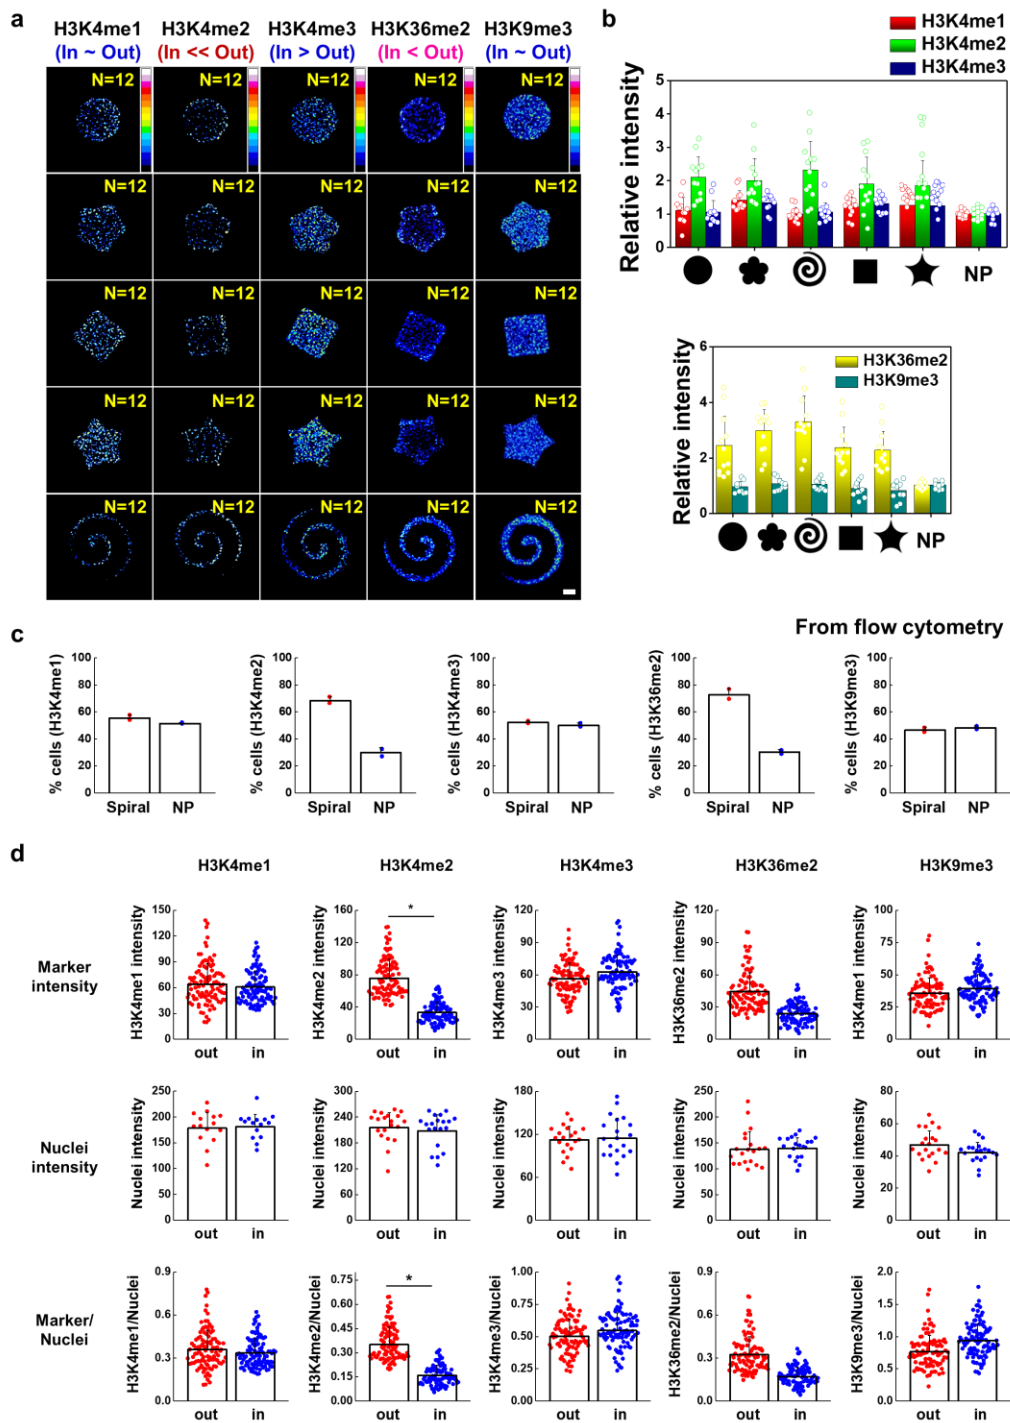

**Supplementary Fig. 2.** **a** Immunofluorescence heatmaps of methylation (H3K4me3/2/1, H3K36me2, and H3K9me3) for B16F0 cells cultured in a panel of shapes. **b** Histone expression of methylation markers for B16F0 cells cultured in a panel of shapes or non-patterned substrates ( $n = 3$ , biological replicates, total 12 patterns for each condition). **c** Quantification of cell ration above the thresholds from the flow cytometry analysis ( $n = 2$ , biological replicates). **d** Intensity of methylation (H3K4me3/2/1, H3K36me2, and H3K9me3) and nuclei for B16F0 cells cultured in the circular shapes. Intensity ratio of histone methylation markers normalized by the fluorescent signal to the intensity of DAPI in B16F0 cells cultured in perimeter or central regions of the circular geometry ( $n = 3$ , biological replicates, total 100 cells for each condition). Scale bars, 50  $\mu\text{m}$ . \* $P < 0.05$ , ANOVA. Error bars represent s.d.

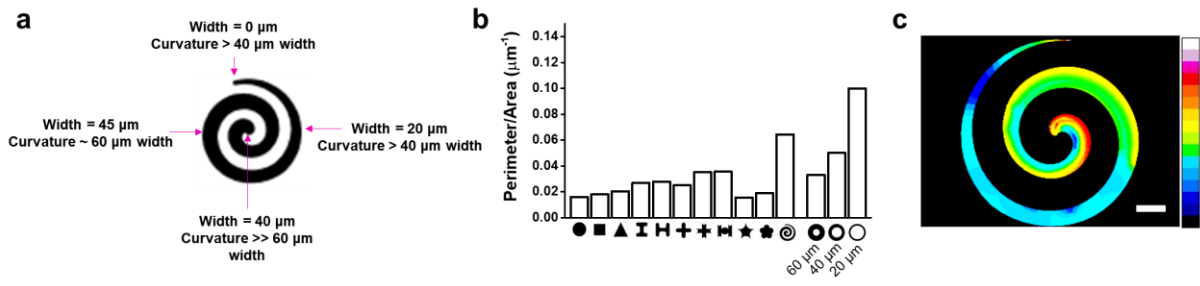

**Supplementary Fig. 3. a** Width and curvature along the spiral shape. **b** Comparison of Perimeter/Area for various geometries. **c** Finite element model of perimeter stress in the spiral shape. Colour bar indicates maximum (top) to minimum (bottom) intensity. Scale bars, 50  $\mu\text{m}$ .

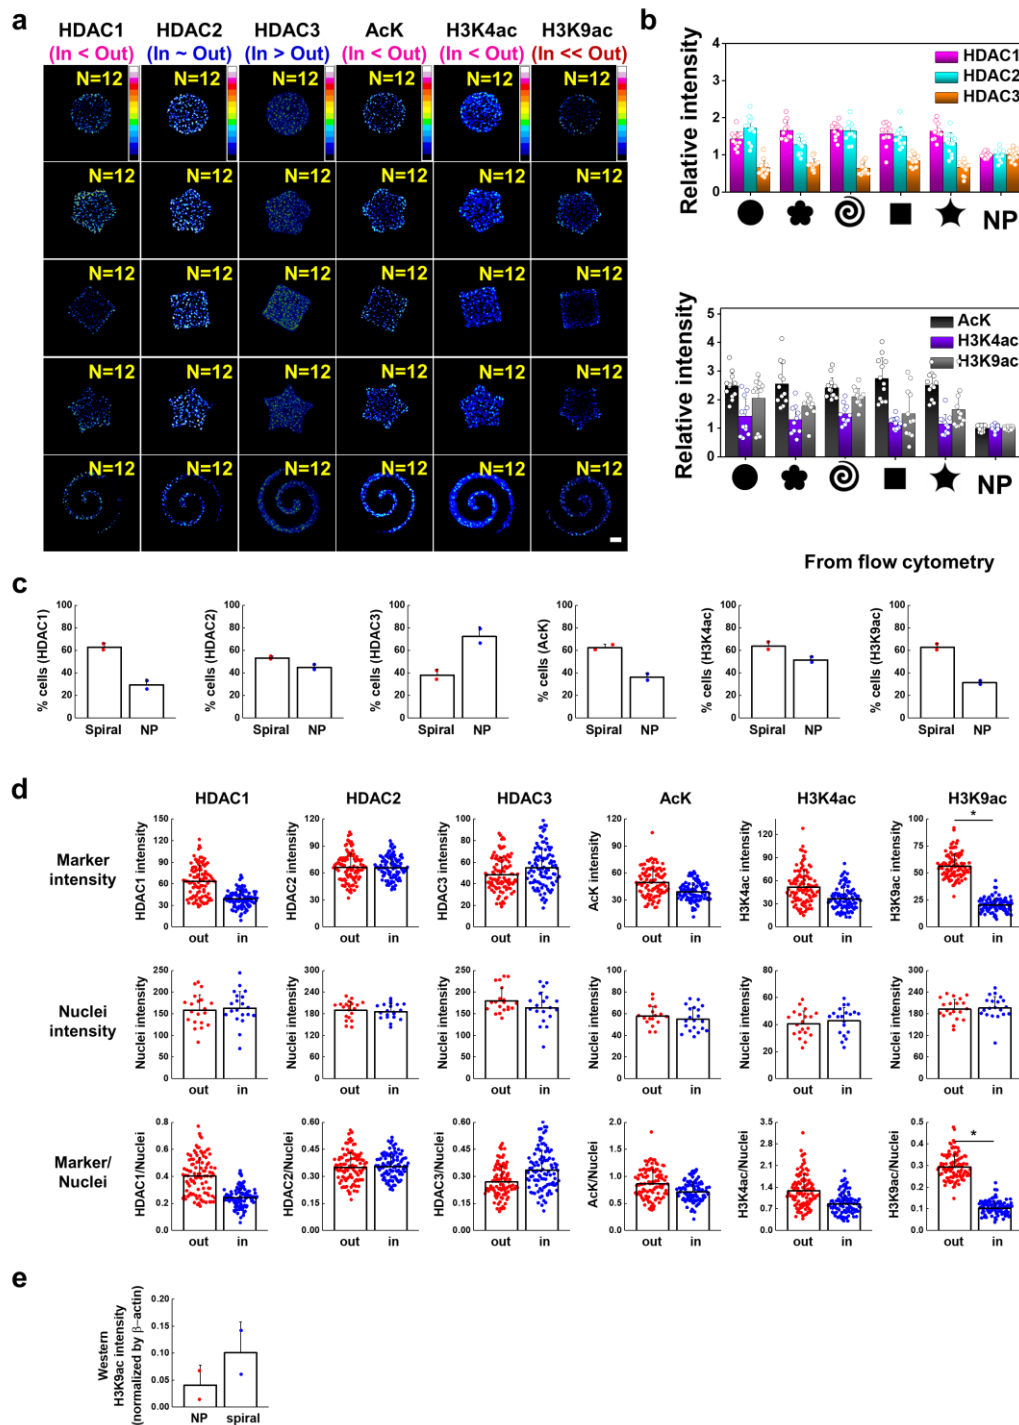

**Supplementary Fig. 4.** **a** Immunofluorescence heatmaps of HDAC1/2/3 and acetylation (H3K4ac and H3K9ac) for B16F0 cells cultured in a panel of shapes. **b** Intensity of acetylation markers for B16F0 cells cultured in a panel of shapes or non-patterned substrates ( $n = 3$ , biological replicates, total 12 patterns for each condition). **c** Quantification of cell ration above the thresholds from the flow cytometry analysis ( $n = 2$ , biological replicates). **d** Intensity of acetylation and deacetylation markers (HDAC1/2/3, AcK, H3K4ac, and H3K9ac) and nuclei for B16F0 cells cultured in the circular shapes. Intensity ratio of histone acetylation and deacetylation markers normalized by the fluorescent signal to the intensity of DAPI in B16F0 cells cultured in perimeter or central regions of the circular geometry ( $n = 3$ , biological replicates, total 100 cells for each condition). **e** Quantified difference in H3K9ac relative to the loading control ( $n = 2$ , biological replicates). Scale bars, 50  $\mu\text{m}$ . \* $P < 0.05$ , ANOVA. Error bars represent s.d.

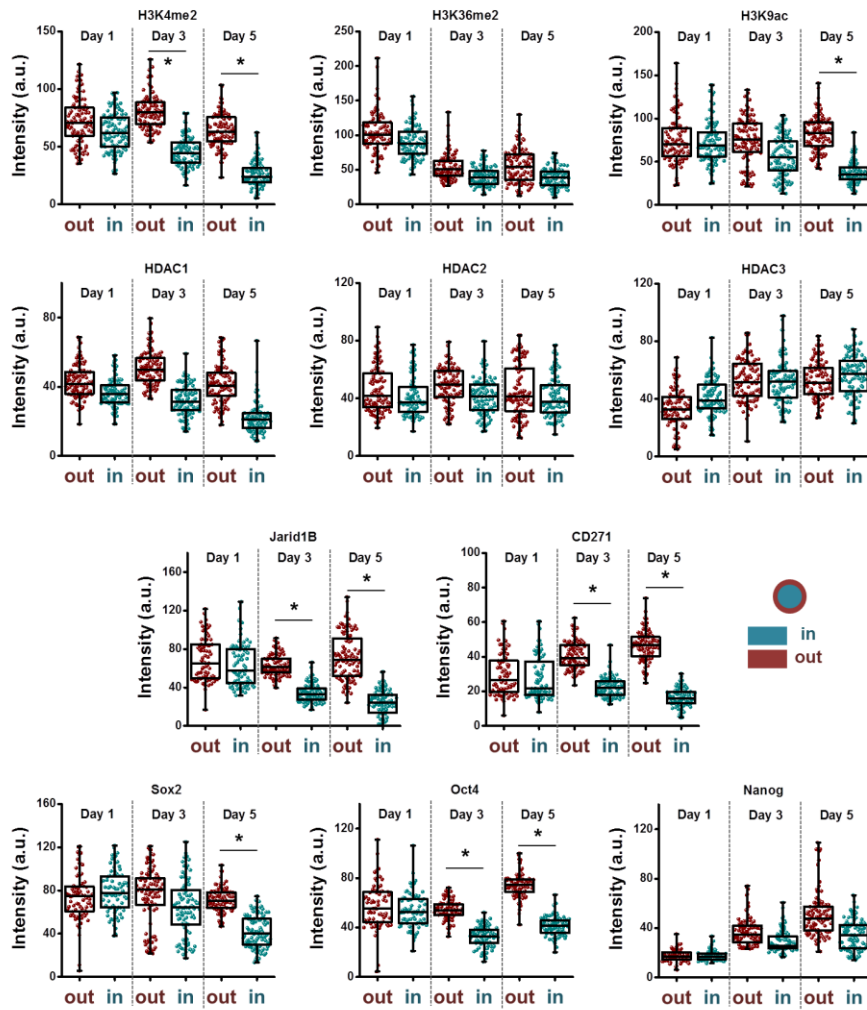

**Supplementary Fig. 5.** Intensity of Histone modifications (H3K4me2, H3K36me2, H3K9ac, and HDAC1/2/3), MIC markers (Jarid1B and CD271), and transcriptional factors related to stemness and MIC state (Sox2, Oct4, and Nanog) depending on culture time (day 1, 3, and 5) for cells cultured on different regions (outside/inside ratio) of circular shape ( $n = 3$ , biological replicates, total 100 cells for each condition except for Jarid1B, CD271, Sox2, Oct4, Nanog on day 1).  $*P < 0.05$ , ANOVA. Error bars represent s.d.

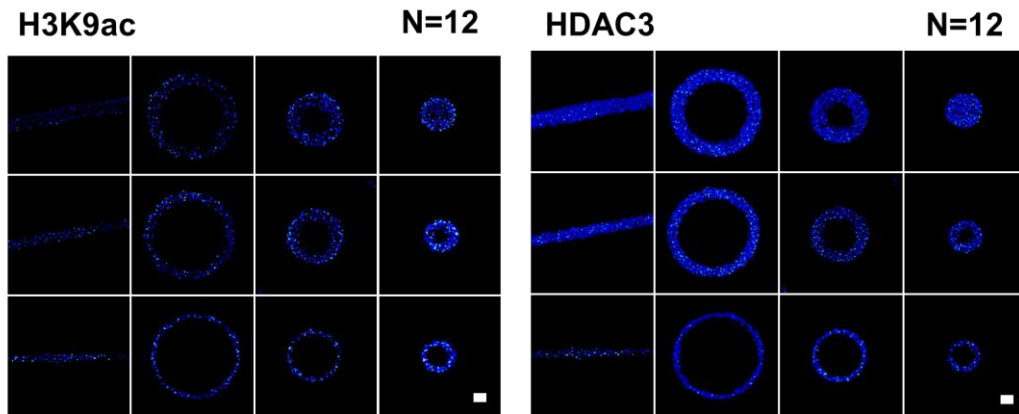

**Supplementary Fig. 6.** Immunofluorescence heatmaps of H3K9ac and HDAC3 for B16F0 cells cultured in shapes regulating curvature and perimeter/area. Scale bars, 50  $\mu\text{m}$ .

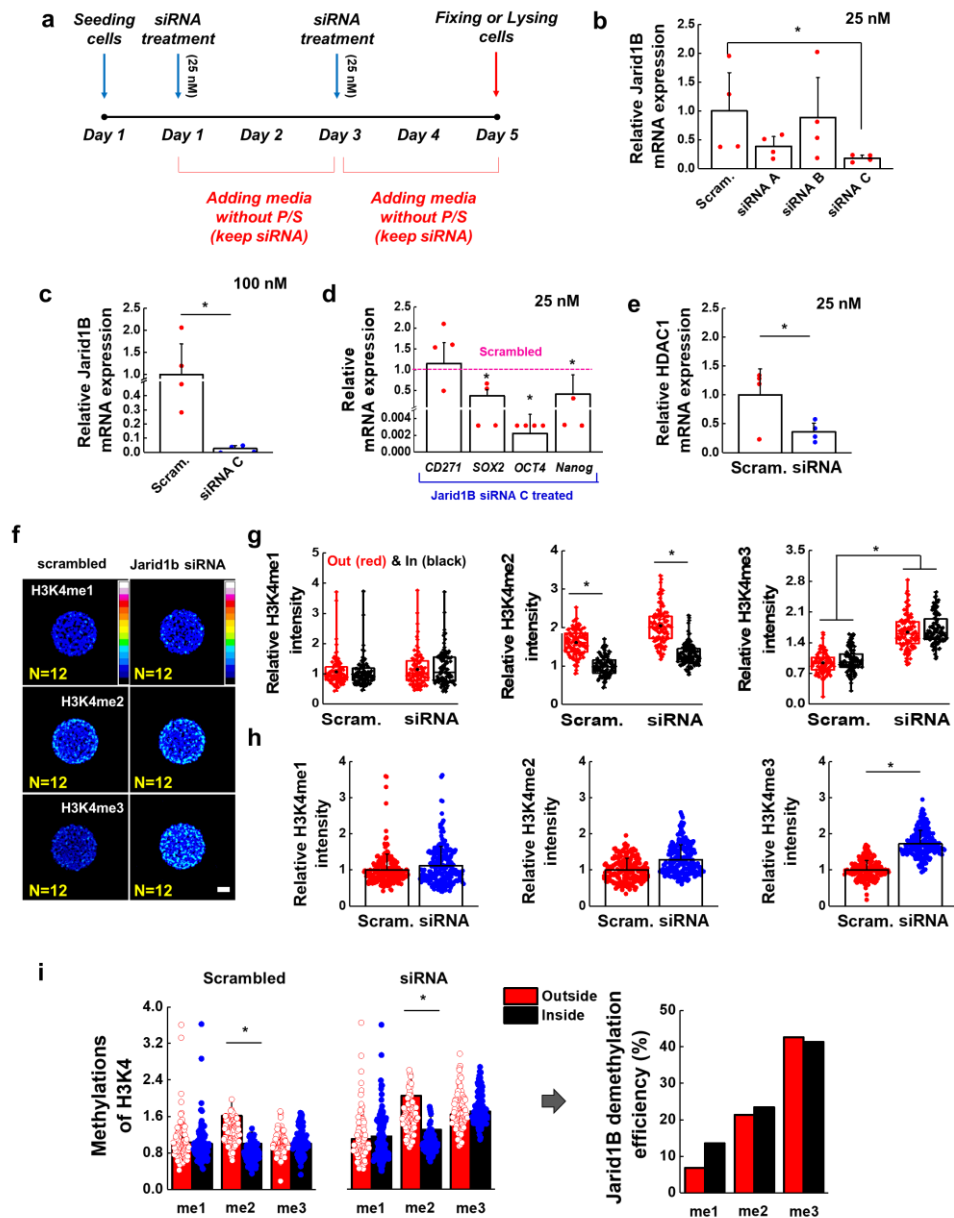

**Supplementary Fig. 7.** **a** Media conditions for normal, inhibition, or siRNA transfection. Results of real-time PCR to measure the gene expression of Jarid1B (three different sequences of Jarid1B siRNAs (A, B, and C) with different concentrations, **b** 25 or **c** 100 nM. **d** Results of real-time PCR to measure the gene expression of CD271, Sox2, Oct4, and Nanog for B16F0 cells cultured on spiral geometries for 5 days with Jarid1B or scrambled siRNAs and **e** HDAC1 for cells cultured on spiral geometry for 5 days with Jarid1B or scrambled siRNAs (n = 4, biological replicates, except for *Nanog*: n = 3, biological replicates). **f** Immunofluorescence heatmaps of H3K4me3/2/1 expression for B16F0 cells cultured on circular geometries treated with scrambled or Jarid1B siRNA. **g** Jarid1B regulates the levels of demethylation of H3K4me3/2/1 with different efficiencies (n = 4, biological replicates, total 100 cells for each condition). Intensity values were normalized by the value from cells cultured in the inner side with scrambled. **h** Quantification of general differences in H3K4me1/2/3 levels. Intensity values were normalized by scrambled. **i** Histone H3K4me3/2/1 expression for B16F0 cells cultured in perimeter or central regions of the circular geometry (n = 4, biological replicates), and calculated Jarid1B demethylation efficiency through the composition between cells cultured with scrambled and Jarid1B siRNA. \* $P < 0.05$ , ANOVA. Error bars represent s.d.

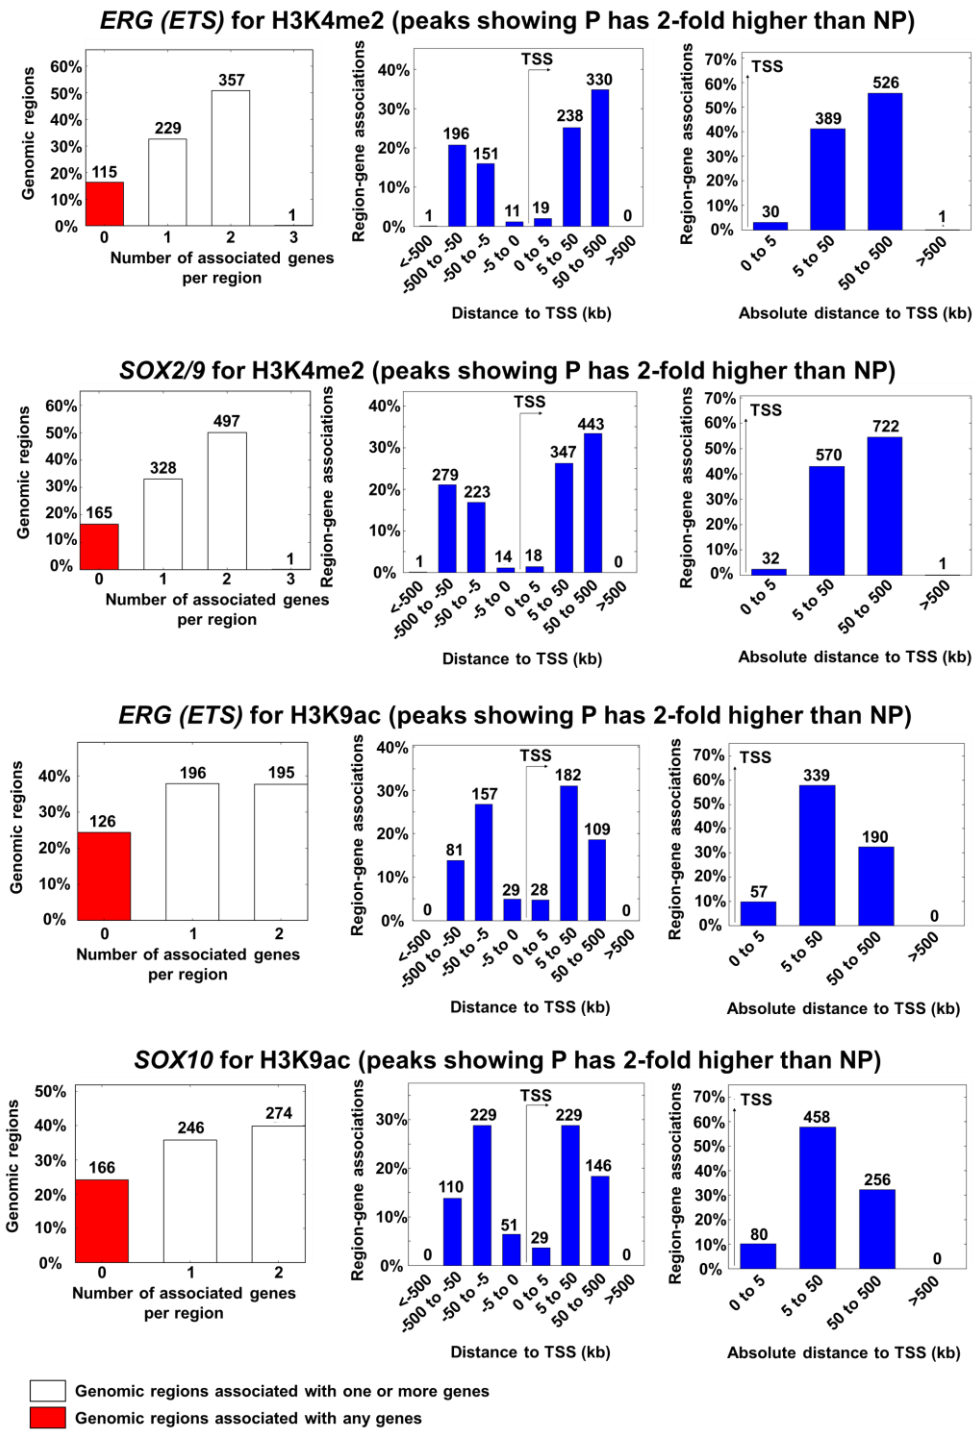

**Supplementary Fig. 8.** Number of associated genes per region and binned by distance (with orientation or absolute value) to generate enriched annotations (GREAT) of genes for cells cultured on spiral patterns that contain a specific motif (*SOX* or *ETS* family) within the promoter.





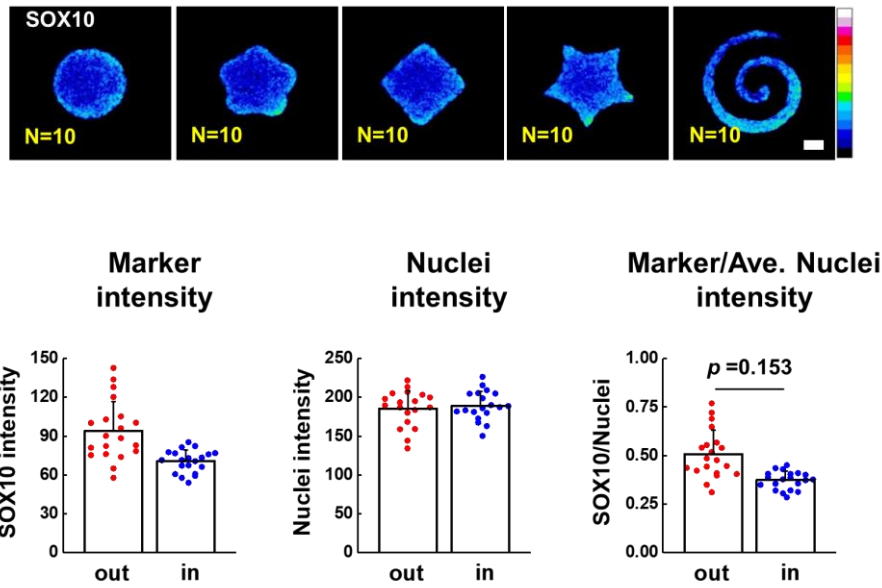

**Supplementary Fig. 10.** Immunofluorescence heatmaps of SOX10 for B16F0 cells cultured in a panel of shapes. Intensity ratio of SOX10 normalized by the fluorescent signal to the intensity of DAPI ( $n = 3$ , biological replicates, total 20 patterns for each condition. Scale bars, 50  $\mu\text{m}$ .  $P$  value from ANOVA. Error bars represent s.d.

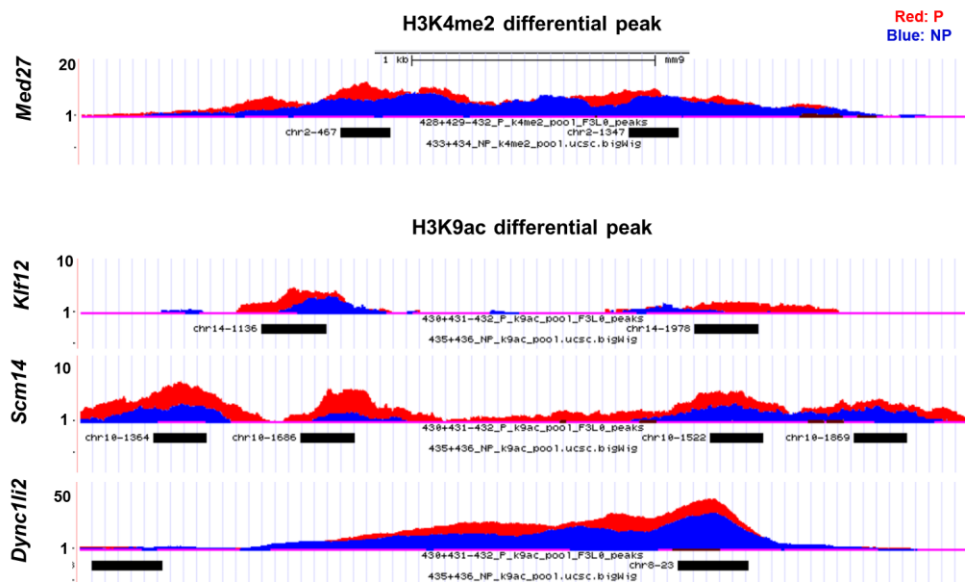

**Supplementary Fig. 11.** Differential peaks of H3K4me2 (*Med27* and *Trim14*) and H3K9ac (*Klf12*, *Scml4*, and *Dync1li2*) associated with cells cultured on patterned gels compared to those cultured on non-patterned gels.

**a**

| GENE NAME                                                |
|----------------------------------------------------------|
| EP300 interacting inhibitor of differentiation 2(Eid2)   |
| Iroquois related homeobox 6 (Drosophila)(Irx6)           |
| JAZF zinc finger 1(Jazf1)                                |
| Kruppel-like factor 12(Klf12)                            |
| MvoD family inhibitor domain containing(Mdfic)           |
| T-box 4(Tbx4)                                            |
| TOX high mobility group box family member 3(Tox3)        |
| engrailed 1(En1)                                         |
| histone deacetylase 7(Hdac7)                             |
| low density lipoprotein receptor-related protein 6(Lrp6) |
| sex comb on midleg-like 4 (Drosophila)(Scml4)            |
| zinc finger protein 600(Zfp600)                          |
| zinc finger protein 982(Zfp982)                          |
| zinc finger protein 985(Zfp985)                          |

**b**

| GENE NAME                                                                                                                |
|--------------------------------------------------------------------------------------------------------------------------|
| EP300 interacting inhibitor of differentiation 2(Eid2)                                                                   |
| T-box 4(Tbx4)                                                                                                            |
| engrailed 1(En1)                                                                                                         |
| low density lipoprotein receptor-related protein 6(Lrp6)                                                                 |
| sema domain, immunoglobulin domain (Ig), transmembrane domain (TM) and short cytoplasmic domain, (semaphorin) 4D(Sema4d) |

**Supplementary Fig. 12. a** The top enriched GO category regulating transcription. **b** The other TFs that *SOX10* binds nearby in B16s.

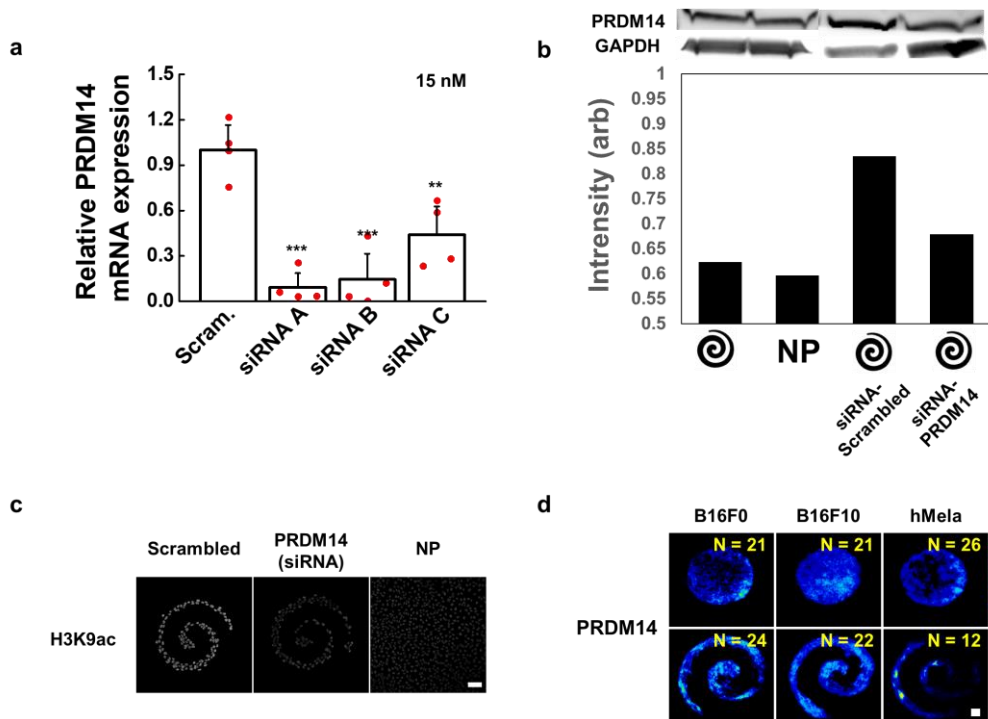

**Supplementary Fig. 13. a** Results of real-time PCR to measure the gene expression of *PRDM14* (three different sequences of *PRDM14* siRNAs (A, B, and C) with 15 nM concentrations. **b** Western blots for *PRDM14* with scrambled or siRNA against *PRDM14*. **c** Representative immunofluorescence images of H3K9ac for B16F0 cells cultured in the spiral shapes with scrambled or *PRDM14* siRNAs. A representative image of H3K9ac for B16F0 cells cultured on non-patterned substrates to compare the level of H3K9ac to patterned cells with *PRDM14* siRNAs. **d** Immunofluorescence heatmaps of *PRDM14* for B16F0, B16F10, and hMela cells cultured in circular and spirial shapes. (Scale bars, 50  $\mu$ m. \*\* $P < 0.005$ , \*\*\* $P < 0.0005$ , ANOVA. Error bars represent s.d.

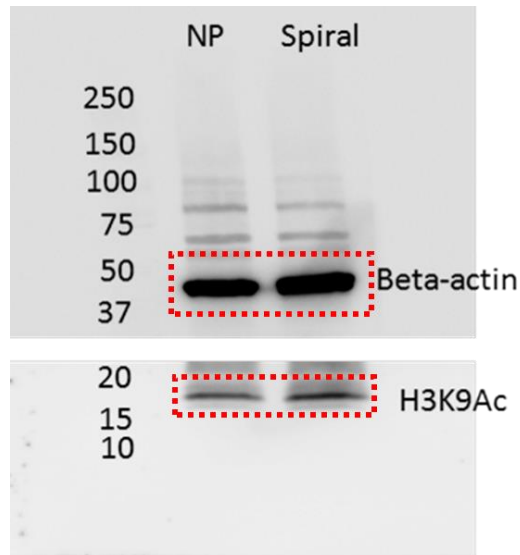

**Supplementary Fig. 14.** Uncropped western blot image corresponding to Fig. 2d.

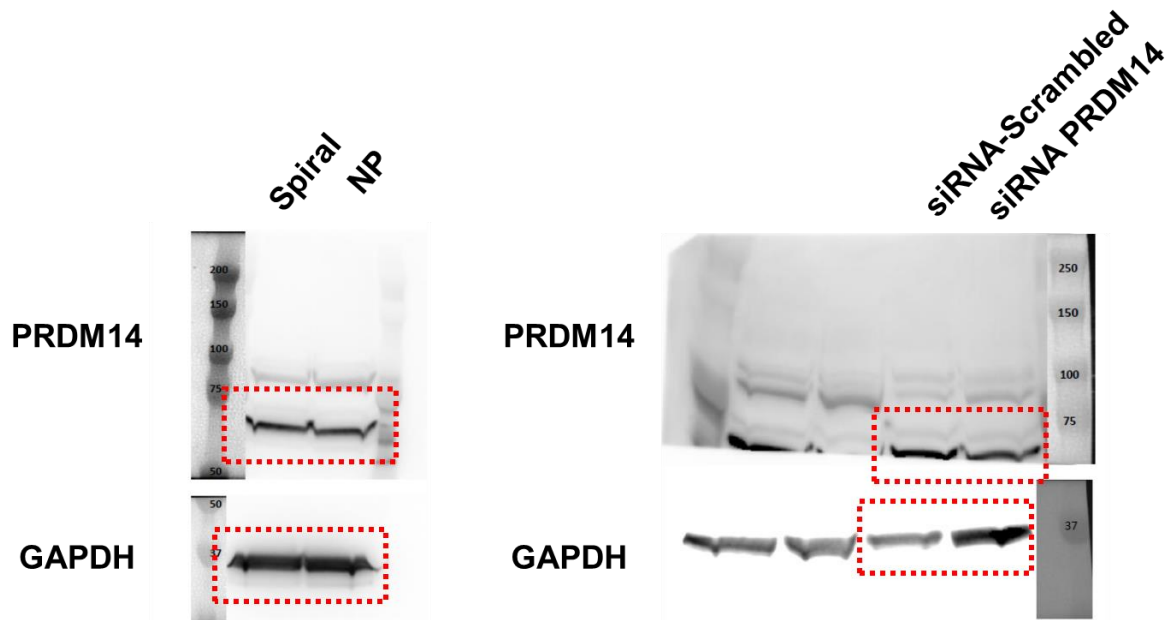

**Supplementary Fig. 15.** Uncropped western blot image corresponding to Supplementary Fig. 13b.

| Sample      | # overlaps | p-value  |
|-------------|------------|----------|
| P_k4me2     | 1758       | 2.74E-28 |
| P_k9ac      | 870        | 9.72E-22 |
| NP_k4me2    | 1652       | 2.14E-25 |
| NP_k9ac     | 917        | 5.18E-23 |
| PvsNP_k4me2 | 42         | 4.13E-01 |
| PvsNP_k9ac  | 52         | 2.21E-02 |
| NPvsP_k4me2 | 40         | 2.28E-02 |
| NPvsP_k9ac  | 61         | 1.06E-03 |

**Supplementary Table 1.** Peak co-occurrence of *PRDM14* with the H3K9ac and H3K4me2 marks from our study within 1000bp.

| Name                     | Company       | Catalog # |
|--------------------------|---------------|-----------|
| High Glucose DMEM        | Corning       | 10-013-CV |
| Fetal bovine serum (FBS) | Denville      | FB5001    |
| 12 well plates           | VWR           | 10062-894 |
| pen streptomycin         | GIBCO         | 15140122  |
| Trypsin 0.25%            | GIBCO         | 15050-065 |
| Sodium periodate         | SIGMA-ALDRICH | 311448    |
| Fibronectin              | SIGMA         | F2006     |

**Supplementary Table 2.** Reagent information for cell culture.

| Antibody             | Company        | Catalog # | Dilution/<br>Application |
|----------------------|----------------|-----------|--------------------------|
| DAPI                 | INVITROGEN     | D3571     | 1:5000/IF                |
| Actin                | INVITROGEN     | A12379    | 1:200/IF                 |
| Goat 488-anti-rabbit | ABCAM          | AB150077  | 1:200/IF                 |
| Goat 647-anti-mouse  | ABCAM          | AB150115  | 1:200/IF                 |
| CD271                | ABGENT         | AM1842a   | 1:250/IF, FC             |
| Jarid1B              | BETHYL         | A301-813A | 1:500/IF, FC             |
| Oct4                 | ABCAM          | AB27985   | 1:500/IF, FC             |
| Sox2                 | ABCAM          | AB97959   | 1:250/IF, FC             |
| Nanog                | SIGMA          | N3038     | 1:500/IF, FC             |
| Stat3                | ABCAM          | AB119352  | 1:500/IF                 |
| a5b1                 | MILLIPORE      | MAB1969   | 1 µg/ml, blocking        |
| H3K4me1              | CELL SIGNALING | 5326      | 1:250/IF, FC             |
| H3K4me2              | CELL SIGNALING | 9725      | 1:250/IF, FC             |
| H3K4me3              | CELL SIGNALING | 9751      | 1:250/IF, FC             |
| H3K36me2             | CELL SIGNALING | 2901      | 1:250/IF, FC             |
| H3K9me3              | CELL SIGNALING | 13969     | 1:250/IF, FC             |
| HDAC1                | CELL SIGNALING | 5356      | 1:500/IF, FC             |
| HDAC2                | CELL SIGNALING | 5113      | 1:500/IF, FC             |
| HDAC3                | CELL SIGNALING | 3949      | 1:500/IF, FC             |
| AcK                  | CELL SIGNALING | 9441      | 1:500/IF, FC             |
| H3K4ac               | ABCAM          | AB113672  | 1:250/IF, FC             |
| H3K9ac               | CELL SIGNALING | 9649      | 1:250/IF, FC             |
| PRDM14               | ABCLONAL       | A13658    | 1:500/IF                 |
| SOX10                | ABCAM          | AB212843  | 1:500/IF                 |

**Supplementary Table 3.** Antibody information for immunostaining, flow cytometry analysis, and integrin blocking.

| Primer         | Forward                        | Reverse                     |
|----------------|--------------------------------|-----------------------------|
| <i>Jarid1B</i> | GACATCACAAGCGAATGGTG           | CGCTTTCATCCACAAGATCC        |
| <i>CD271</i>   | GGG GGT AGA CCT TGT GAT CC     | GTG TGC GAG GAC ACT GAG C   |
| <i>OCT4</i>    | TGC CCG AAA CCC ACA CTG        | CTC GGA CCA CAT CCT TCT CG  |
| <i>SOX2</i>    | TGC TGC CTC TTT AAG ACT AGG AC | CGC CGC CGA TGA TTG TTA TT  |
| <i>Nanog</i>   | AAC AGG TGA AGA CCT GGT TCC    | GAG GCC TTC TGC GTC ACA C   |
| <i>HDAC1</i>   | CAA ATT GTG AGT CAT GCG GA     | GGC ACC AAG AGG AAA GTC TG  |
| <i>GAPDH</i>   | TGC CTC GAT GGG TGG AGT        | GCC CAA TAC GAC CAA ATC AGA |

**Supplementary Table 4.** RT-PCR primer sequence information.
